# Supplementary material for: Seg1 controls eisosome assembly and shape
Source: PubMed Central journal article supplement — J Cell Biol. 2012 Aug 6;198(3):405–20. doi: 10.1083/jcb.201202097 (PMC3413353; doi:10.1083/jcb.201202097), 2012-08-06
Supplement: supp_jcb.201202097_JCB_201202097_sm.pdf [file supp_jcb.201202097_JCB_201202097_sm.pdf]

Moreira et al., <http://www.jcb.org/cgi/content/full/jcb.201202097/DC1>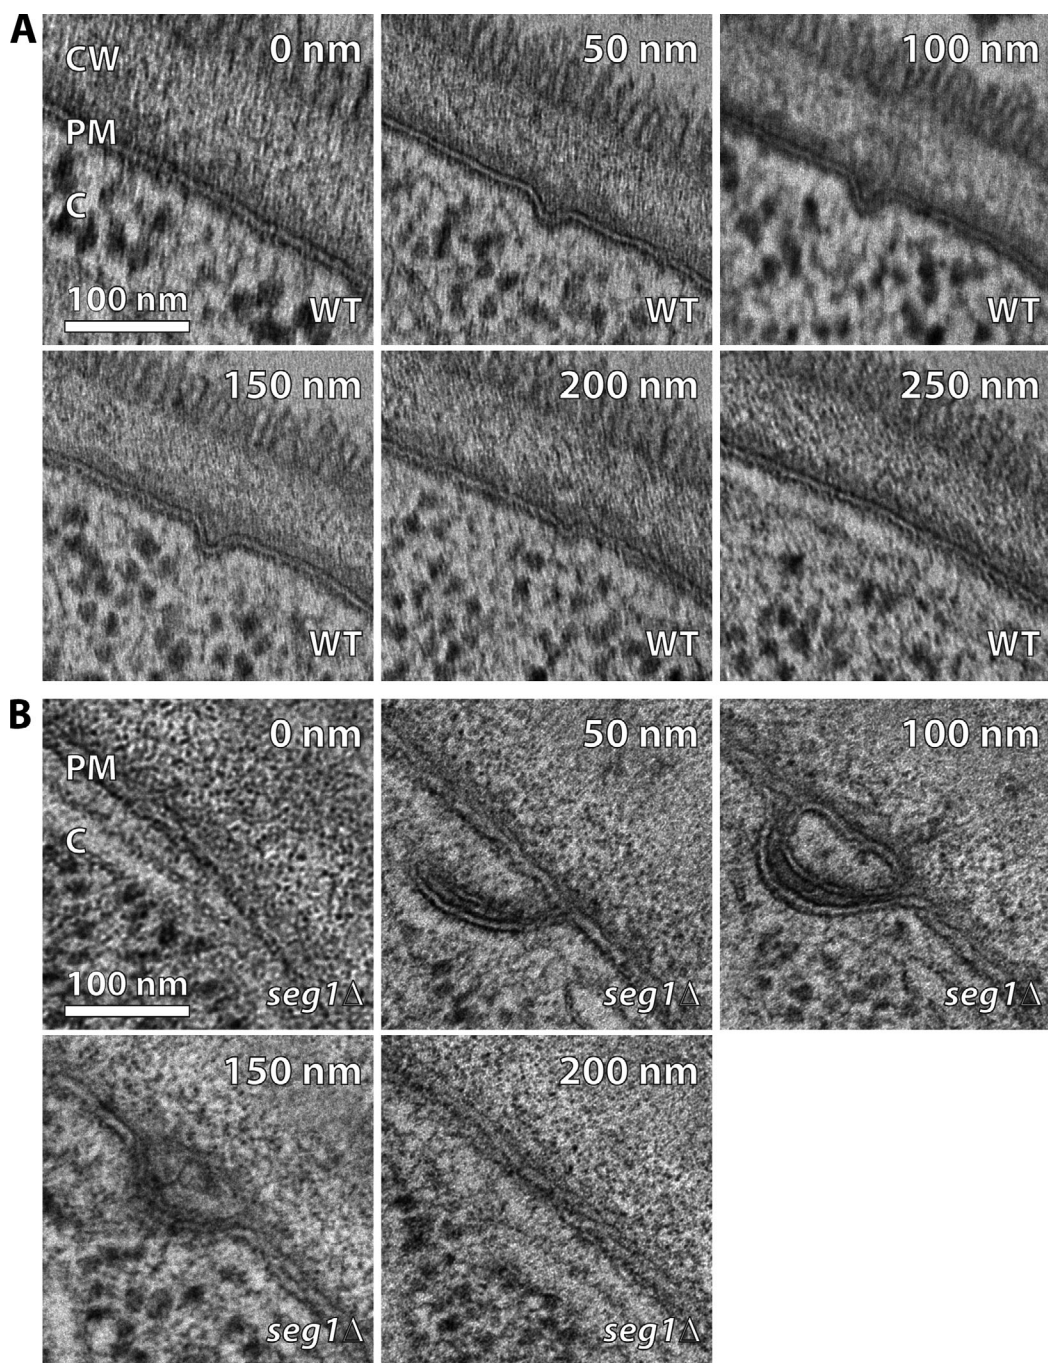

Figure S1. **Plasma membrane morphology in wild-type and *seg1*Δ cells.** (A) Electron micrographs of sequential 50-nm sections from a wild-type (WT) cell following a plasma membrane furrow ~200 nm long. (B) As in A, but following a large, irregular plasma membrane invagination in a *seg1*Δ cell. CW, cell wall; PM, plasma membrane; C, cytoplasm.

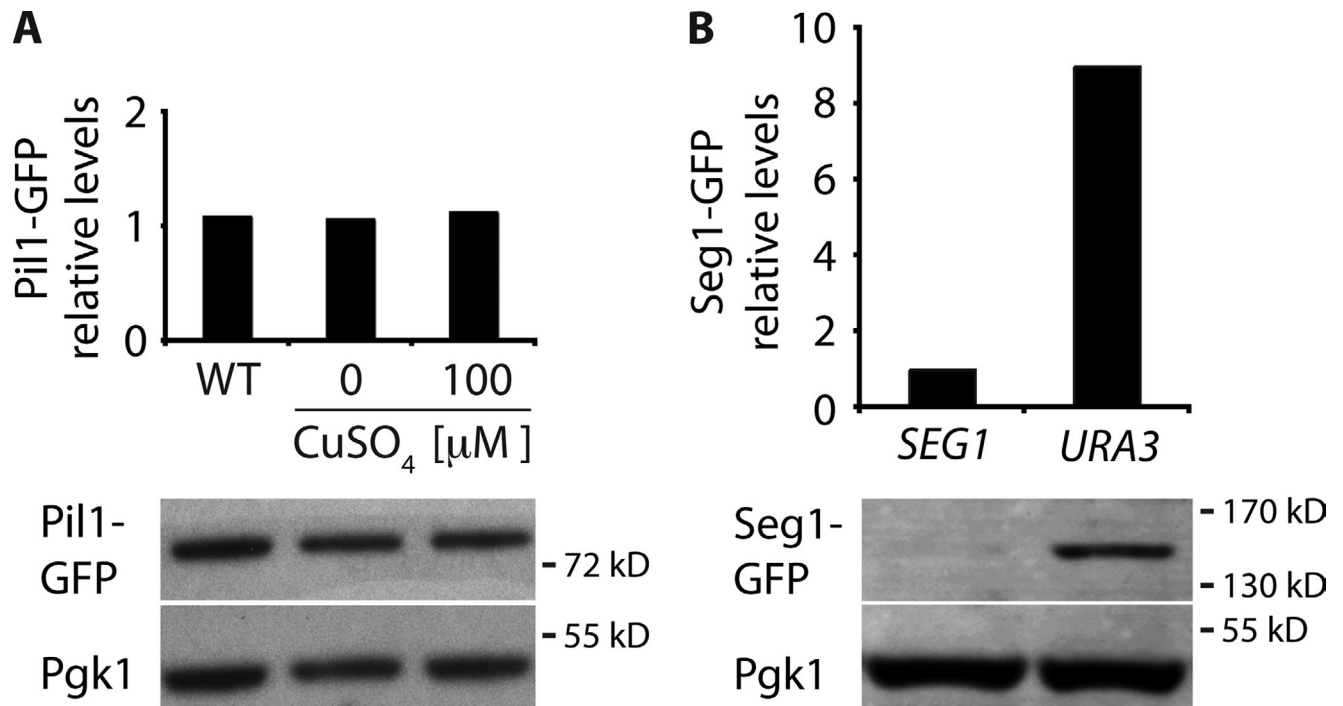

Figure S2. **Pil1-GFP and Seg1-GFP levels in Seg1 overexpression strains.** (A) Pil1-GFP levels are unaffected by Seg1 overexpression. Western blots and quantification of Pil1-GFP levels relative to Pgk1 in cells expressing Pil1-GFP (WT) and cells additionally expressing Seg1 from the *CUP1* promoter are shown. The latter were grown overnight in the presence of 0 or 100 μM CuSO<sub>4</sub>. Pil1-GFP levels were normalized to WT. (B) Seg1-GFP expression from the *URA3* locus produces elevated levels. Western blots and quantification of Seg1-GFP levels relative to Pgk1 in cells expressing Seg1-GFP from the *SEG1* locus (*SEG1*) and cells lacking endogenous Seg1 but expressing Seg1-GFP from the *URA3* locus (*URA3*) are shown. The experiments shown in A and B were each performed once.

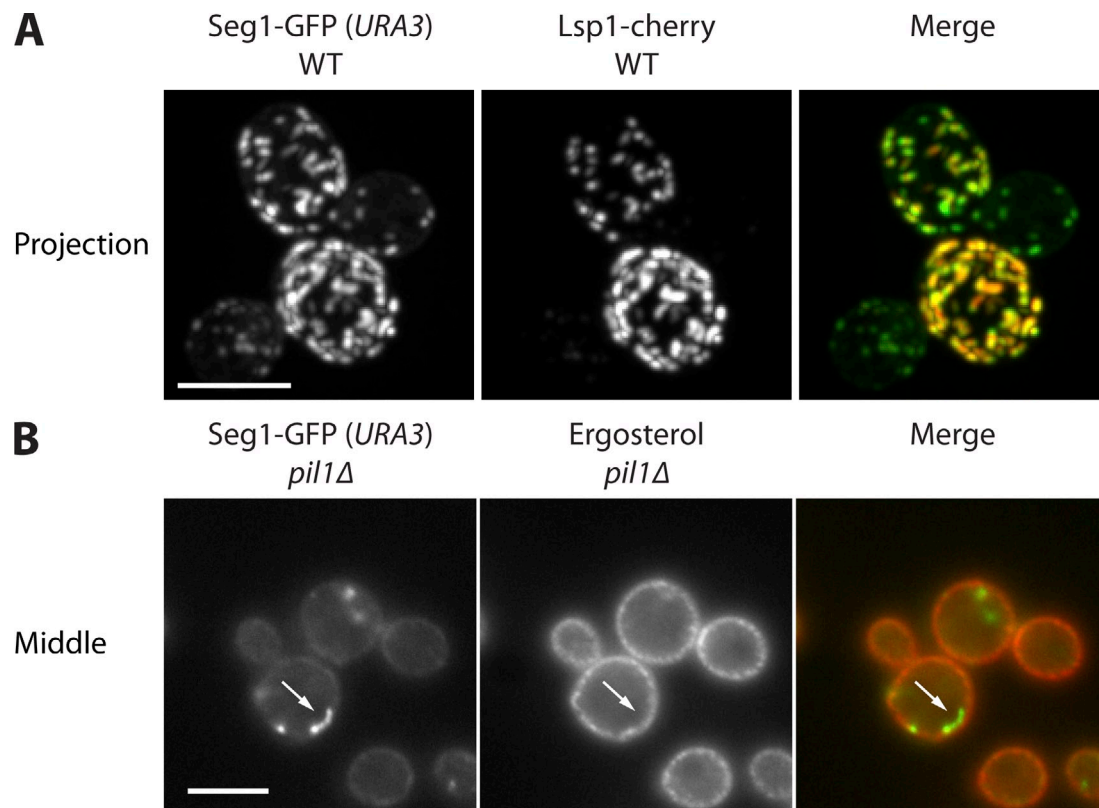

Figure S3. **Localization of Lsp1 and ergosterol to Seg-GFP rods.** (A) Projections from confocal stacks of wild-type (WT) cells expressing Lsp1-cherry, lacking endogenous Seg1, and expressing Seg1-GFP from the *URA3* locus. (B) Epifluorescence images of *pil1Δ* cells lacking endogenous Seg1, expressing Seg1-GFP from the *URA3* locus, and stained with filipin to visualize ergosterol. The arrows indicate a Seg1-GFP rod. Bars, 5  $\mu$ m.



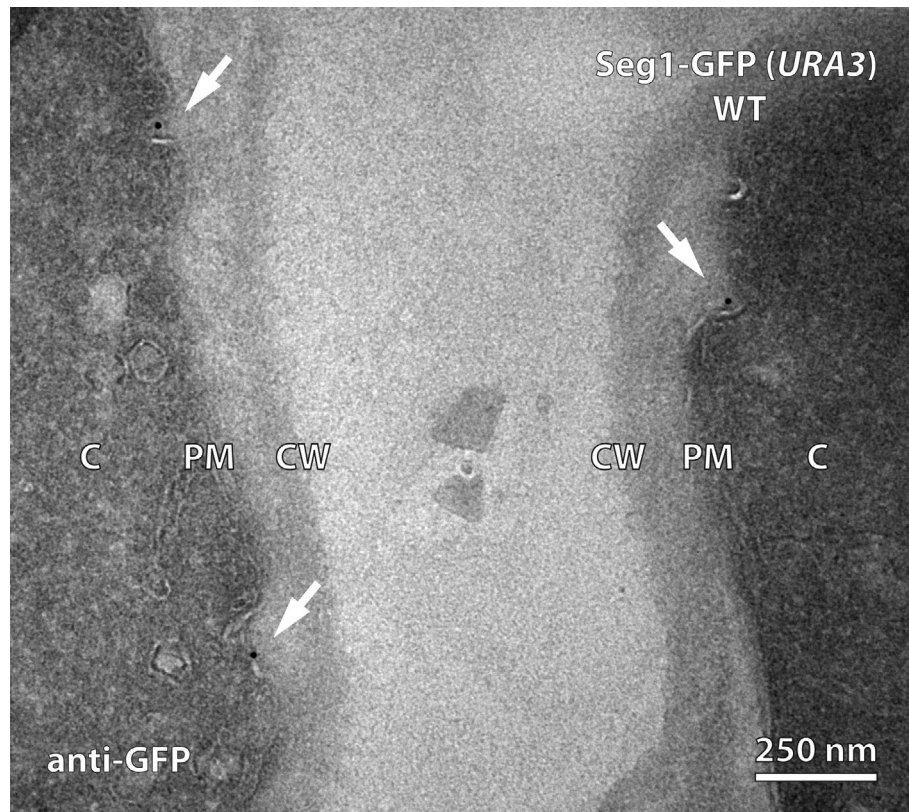

Figure S4. **Immunogold labeling of GFP in cells overexpressing Seg1-GFP.** Electron micrographs of two adjacent wild-type (WT) cells lacking endogenous Seg1, expressing Seg1-GFP from the *URA3* locus, and labeled with anti-GFP antibody and gold-conjugated protein A. Arrows indicate gold particles. Note that all gold particles are found in plasma membrane invaginations. CW, cell wall; PM, plasma membrane; C, cytoplasm.

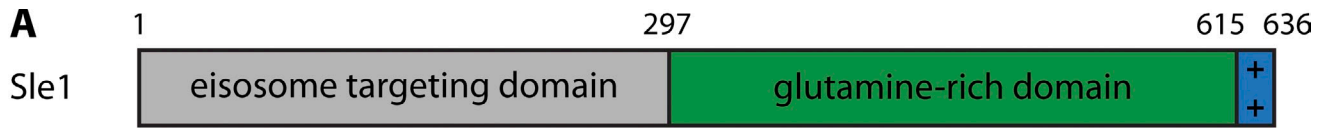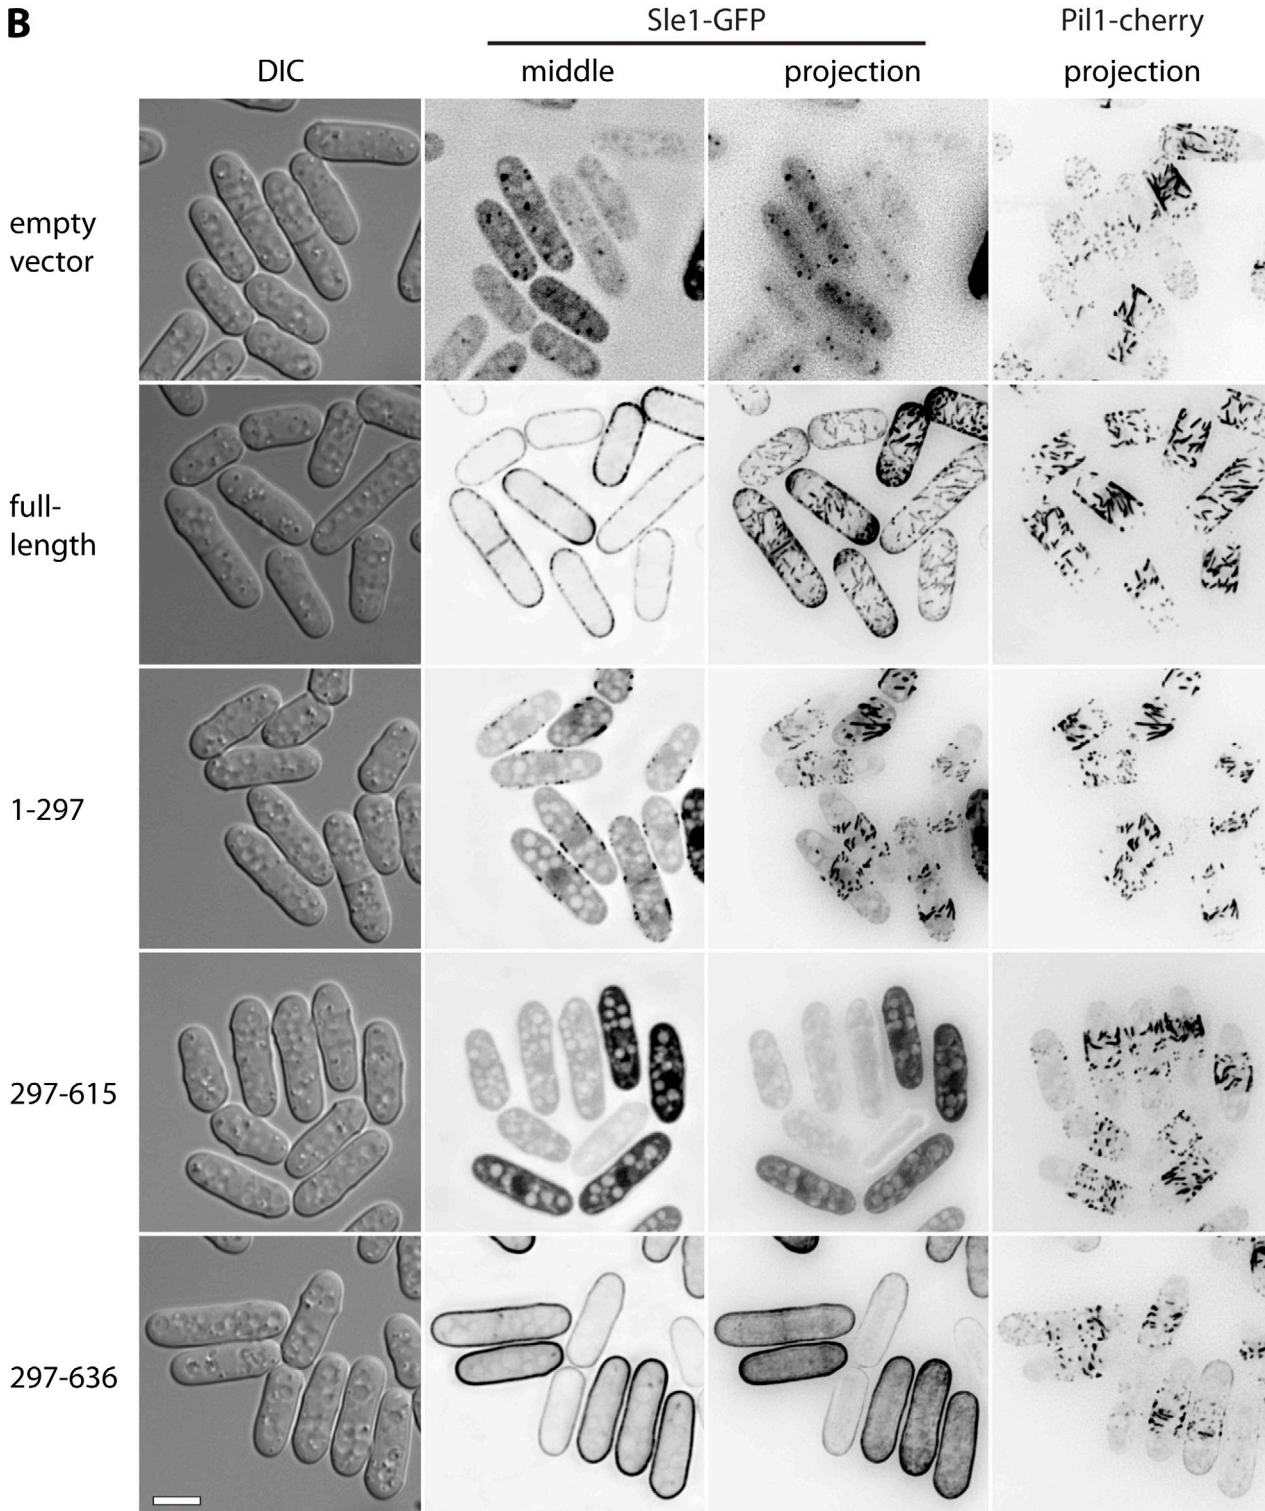

Figure S5. **Domain structure and eisosome targeting of Sle1/SPAC1A6.07.** (A) Schematic of the domain structure of *S. pombe* Sle1/SPAC1A6.07. Plus signs denote the polybasic C terminus. (B) Differential interference contrast, middle focal plane, and maximum projection images from confocal stacks of *pil1-cherry sle1Δ* cells expressing the indicated Sle1-GFP constructs. Projections are from deconvolved z planes in the top half of cells. Bar, 5 μm.

Table S1. *S. cerevisiae* strains used in this study

| Strain              | Genotype                                                                                                                                                     |
|---------------------|--------------------------------------------------------------------------------------------------------------------------------------------------------------|
| CRY1                | <i>MAT<math>\alpha</math> ade2-1 can1-100 his3-11,15 leu2-3,112 trp1-1 ura3-1</i>                                                                            |
| CRY2                | <i>MAT<math>\alpha</math> ade2-1 can1-100 his3-11,15 leu2-3,112 trp1-1 ura3-1</i>                                                                            |
| TWY110 <sup>a</sup> | <i>MAT<math>\alpha</math> PIL1-GFP::HIS3</i>                                                                                                                 |
| TWY113 <sup>a</sup> | <i>MAT<math>\alpha</math> LSP1-GFP::HIS3</i>                                                                                                                 |
| TWY70 <sup>a</sup>  | <i>MAT<math>\alpha</math> his3<math>\Delta</math>1 leu2<math>\Delta</math>0 lys2<math>\Delta</math>0 ura3<math>\Delta</math>0</i>                            |
| TWY1118             | <i>MAT<math>\alpha</math> SEG1-TEV-GFP::HIS3 his3<math>\Delta</math>1 leu2<math>\Delta</math>0 lys2<math>\Delta</math>0 ura3<math>\Delta</math>0</i>         |
| KEM120              | <i>MAT<math>\alpha</math> PIL1-GFP::HIS3 seg1<math>\Delta</math>::NAT<sup>R</sup></i>                                                                        |
| KEM121              | <i>MAT<math>\alpha</math> seg1<math>\Delta</math>::NAT<sup>R</sup></i>                                                                                       |
| KEM18               | <i>MAT<math>\alpha</math> pil1<math>\Delta</math>::LEU2</i>                                                                                                  |
| KEM122              | <i>MAT<math>\alpha</math> SEG1-GFP::HIS3 PIL1-cherry::KAN<sup>R</sup></i>                                                                                    |
| KEM130              | <i>MAT<math>\alpha</math> SEG1-GFP::HIS3</i>                                                                                                                 |
| KEM124              | <i>MAT<math>\alpha</math> SEG1-GFP::HIS3 pil1<math>\Delta</math>::LEU2</i>                                                                                   |
| KEM134              | <i>MAT<math>\alpha</math> SEG1-GFP::HIS3 pil1<math>\Delta</math>::LEU2 lsp1<math>\Delta</math>::NAT<sup>R</sup></i>                                          |
| KEM153              | <i>MAT<math>\alpha</math> seg1<math>\Delta</math>942-GFP::TRP1</i>                                                                                           |
| KEM154              | <i>MAT<math>\alpha</math> seg1<math>\Delta</math>942-GFP::TRP1 PIL1-cherry::KAN<sup>R</sup></i>                                                              |
| KEM159              | <i>MAT<math>\alpha</math> seg1<math>\Delta</math>942-GFP::TRP1 pil1<math>\Delta</math>::KAN<sup>R</sup> lsp1<math>\Delta</math>::HIS3</i>                    |
| KEM161              | <i>MAT<math>\alpha</math> PIL1-GFP::HIS3 seg1<math>\Delta</math>942::KAN<sup>R</sup></i>                                                                     |
| KEM126              | <i>MAT<math>\alpha</math> PIL1-GFP::HIS3 NAT<sup>R</sup>::P<sub>CUP1</sub>-SEG1</i>                                                                          |
| KEM127              | <i>MAT<math>\alpha</math> NAT<sup>R</sup>::P<sub>CUP1</sub>-SEG1-GFP::HIS3</i>                                                                               |
| KEM128              | <i>MAT<math>\alpha</math> ura3::SEG1-GFP seg1<math>\Delta</math>::NAT<sup>R</sup></i>                                                                        |
| KEM132              | <i>MAT<math>\alpha</math> ura3::SEG1-GFP seg1<math>\Delta</math>::NAT<sup>R</sup> pil1<math>\Delta</math>::LEU2</i>                                          |
| KEM135              | <i>MAT<math>\alpha</math> ura3::SEG1-GFP seg1<math>\Delta</math>::NAT<sup>R</sup> pil1<math>\Delta</math>::LEU2 lsp1<math>\Delta</math>::KAN<sup>R</sup></i> |
| KEM141              | <i>MAT<math>\alpha</math> ura3::SEG1-GFP seg1<math>\Delta</math>::NAT<sup>R</sup> PIL1-cherry::KAN<sup>R</sup></i>                                           |
| KEM148              | <i>MAT<math>\alpha</math> ura3::SEG1-GFP LSP1-cherry::KAN<sup>R</sup></i>                                                                                    |
| KEM146              | <i>MAT<math>\alpha</math> ura3::SEG1-GFP seg1<math>\Delta</math>::NAT<sup>R</sup> pil1<math>\Delta</math>::LEU2 LSP1-cherry::KAN<sup>R</sup></i>             |

All strains used in this study were derived from CRY1 or CRY2. These strains are wild-type W303 (ATCC 201238 and 201240). The only exception is TWY1118, which was derived from TWY70. TWY70 is wild-type BY4742 (ATCC 201389).  
<sup>a</sup>Walther et al., 2006.

## Reference

Walther, T.C., J.H. Brickner, P.S. Aguilar, S. Bernales, C. Pantolja, and P. Walter. 2006. Eisosomes mark static sites of endocytosis. *Nature*. 439:998–1003. <http://dx.doi.org/10.1038/nature04472>
